# Supplementary material for: Prolyl Hydroxylase Paralogs in Nicotiana benthamiana Show High Similarity With Regard to Substrate Specificity
Source: PubMed Central journal article supplement (PMC7960765; doi:10.3389/fpls.2021.636597), 2021-03-02
Supplement: Data_Sheet_1.pdf [file Data_Sheet_1.pdf]

## Supplementary Material

to

### Prolyl hydroxylase paralogs in *Nicotiana benthamiana* show high similarity with regard to substrate specificity

Réka Mócsai<sup>1</sup>, Kathrin Göritzer<sup>2</sup>, David Stenitzer<sup>1</sup>, Daniel Maresch<sup>1</sup>, Richard Strasser<sup>2</sup>, Friedrich Altmann<sup>1\*</sup>

<sup>1</sup> Institute of Biochemistry, Department of Chemistry, University of Natural Resources and Life Sciences, Vienna, Austria

<sup>2</sup> Institute of Plant Biotechnology and Cell Biology, Department of Applied Genetics and Cell Biology, University of Natural Resources and Life Sciences, Vienna, Austria

**\* Correspondence:**

friedrich.altmann@boku.ac.at

### SUPPLEMENTARY TABLES

**Supplementary Table S1.** All oligonucleotides used in this study are collected in this table.

|                                    | Construct | F 5'→3'                              | R 5'→3'                                | Size (bp) |
|------------------------------------|-----------|--------------------------------------|----------------------------------------|-----------|
| Subcloning vector pMiniIT          | Nb_P4H1   | TCCTCCATTTTCAGTTCAGATTTTC            | GGACAAAAATGTTCTAAGATATATCAA            | 961       |
|                                    | Nb_P4H4   | AGGAACCTTATCTCTATCTCTTCTGTCA         | AGTGGGAGGGAGAGGTATAATG                 | 1000      |
|                                    | Nb_P4H9   | CCTCTCTATTTGGGTTGTGTGTGT             | AGAAGGGACAACTGATACTGAGC                | 1102      |
|                                    | Nb_P4H10  | CAGCGACTCAGACTTCATACACT              | GGCTCTCCTCAAGATTGTAACC                 | 1077      |
| Expression vector pVT-Bac-His-1    | Nb_P4H1   | GTTTCTGAGCTCCATAGGATGGAGGACTCACTTGAC | GTTTCTGGTACCTTAGGATACAAGTCTTTGCCTCATCC | 771       |
|                                    | Nb_P4H4   | GTTTCTGAGCTCAACCCATCCAAAGTCAAGCAAAT  | GTTTCTGGTACCTTAACAGGCTTTGCAGCTCTTCC    | 801       |
|                                    | Nb_P4H9   | GTTTCTGAGCTCGGTTCTACTCTCACTCTCAGCAGG | GTTTCTGGTACCTTATTCATCAAGTTCCTGATCCCTG  | 771       |
|                                    | Nb_P4H10  | GTTTCTGAGCTCTCGATTCCCTTTCAGTTCTAAAGG | GTTTCTGGTACCTTAAACCTTGTATTCGTGAACACG   | 747       |
| Plant expression vectors (GFP/RFP) | Nb_P4H1   | TATATCTAGAATGGCTTCGGCAATGAGAATTGTT   | TATAGGATCCGGATACAAGTCTTTGCCTCATCC      | 858       |
|                                    | Nb_P4H4   | TATATCTAGAATGAACAGCTCTTTGCTGCTCG     | TATAAGATCTACAGGCTTTGCAGCTCTTCC         | 882       |
|                                    | Nb_P4H9   | TATATCTAGAATGAAGAACAGAGGCAAATTAC     | TATAGGATCCTTCATCAAGTTCCTGATCCCTG       | 867       |
|                                    | Nb_P4H10  | TATATCTAGAATGGCAGTCAAAGGAAGGCACGTC   | TATAGGATCCAACCTTGTATTTCGTGAACACGCATC   | 870       |
| RNAi vectors                       | Nb_P4H1   | TATAGGTACCTTGCCATCCATTTAGTAG         | TATAGGATCCGAGGGGGGAGAGACATACTTTC       | 213       |
|                                    | Nb_P4H10  | TATAGGTACCGCATCCATTTTCGTAGACGACC     | TATAGGATCCAAATGGTGGTCAACGCATTGCC       | 278       |
| RT-qPCR                            | Nb-P4H1   | GGACTCACTTGACAGAGAATCG               | TGCTAACGGATGTTTGTGTC                   | 73        |
|                                    | Nb-P4H10  | GGAACCAAGAGCTGTTGTGT                 | CCCCTGGCAAGAAATGTTCC                   | 168       |
|                                    | Nb-PP2A   | GACCCTGATGTTGATGTTTCGCT              | GAGGGATTTGAAGAGAGATTTTC                | 123       |

**Supplementary Table S2.** Summarized results of the BLAST searches against *Nicotiana benthamiana* sequence database (<https://benthgenome.qut.edu.au/>) using all known *Arabidopsis thaliana* prolyl 4-hydroxylases (gene accession numbers in brackets). The candidates represented four phylogenetically distant groups, as shown in **Figure 1**. The last three hits were omitted from the list of candidates based on lack of transmembrane domains (TMD) and low homology scores. The 11 candidates were then phylogenetically assessed and 4 of them were selected for further characterization (marked red).

| #  | Name                                                                       | closest to                     | score | Comment                     |
|----|----------------------------------------------------------------------------|--------------------------------|-------|-----------------------------|
| 1  | <b>Nbv6.1trP31841 probable P4H 10</b>                                      | <i>At-P4H3</i><br>(At1g20270)  | 1e-58 | <b>Cloned</b>               |
| 2  | <b>Nbv6.1trP13474 probable P4H 10</b>                                      | <i>At-P4H10</i><br>(At5g66060) | 1e-55 | 84% identity to #1          |
| 3  | <b>Nbv6.1trP17689 probable P4H 10</b>                                      | <i>At-P4H3</i><br>(At1g20270)  | 4e-49 | 96% identity to #1          |
| 4  | <b>Nbv6.1trP32337 probable P4H 3</b>                                       | <i>At-P4H3</i><br>(At1g20270)  | 2e-29 | 79% identity to #1          |
| 5  | <b>Nbv6.1trP71678 prolyl 4-hydroxylase 1</b>                               | <i>At-P4H1</i><br>(At2g43080)  | 8e-23 | <b>Cloned</b>               |
| 6  | <b>Nbv6.1trP28223 probable P4H 9</b>                                       | <i>At-P4H9</i><br>(At4g33910)  | 3e-16 | <b>Cloned</b>               |
| 7  | <b>Nbv6.1trP14824 probable P4H 9</b>                                       | <i>At-P4H9</i><br>(At4g33910)  | 4e-15 | 81% identity to #6          |
| 8  | <b>Nbv6.1trP32386 probable P4H 4</b>                                       | <i>At-P4H4</i><br>(At5g18900)  | 3e-13 | <b>Cloned</b>               |
| 9  | <b>Nbv6.1trP9347 probable P4H 4</b>                                        | <i>At-P4H4</i><br>(At5g18900)  | 3e-13 | 92% identity to #8          |
| 10 | <b>Nbv6.1trP34039 probable P4H 4</b>                                       | <i>At-P4H4</i><br>(At5g18900)  | 2e-11 | 83% identity to #8          |
| 11 | <b>Nbv6.1trP9907 probable P4H 9</b>                                        | <i>At-P4H9</i><br>(At4g33910)  | 6e-08 | 93% identity to #6          |
| 12 | Nbv6.1trP27956 probable 28s rRNA (cytosine-c)-methyltransferase isoform x1 | <i>At P4H7</i><br>(At3g28480)  | 1e-06 | P4H domain, no TMD          |
| 13 | Nbv6.1trP61995 hmg1 2-like protein                                         | <i>At-P4H13</i><br>(At2g23096) | 0.057 | low homology, no P4H domain |
| 14 | Nbv6.1trP17158 probable uncharacterized protein                            | <i>At-P4H12</i><br>(At4g25600) | 0.060 | low homology, no P4H domain |

**Supplementary Table S3.** RNA expression levels of the 11 identified prolyl 4-hydroxylases in *Nicotiana benthamiana* leaf tissue. Data were obtained from the Gene Expression Atlas (version 6) in the *N. benthamiana* database (<https://benthgenome.qut.edu.au/>) The candidates selected for cloning and expression are marked bold. In two cases, data was not available (NA).

| Transcript ID         | Name                                    | Expression level in leaf tissue (reads per million) |
|-----------------------|-----------------------------------------|-----------------------------------------------------|
| <b>Nbv6.1trP71678</b> | <b>prolyl 4-hydroxylase 1</b>           | 5                                                   |
| <b>Nbv6.1trP32386</b> | <b>probable prolyl 4-hydroxylase 4</b>  | 32                                                  |
| Nbv61trP34039         | probable prolyl 4-hydroxylase 4         | 20                                                  |
| Nbv61trP9347          | probable prolyl 4-hydroxylase 4         | 13                                                  |
| <b>Nbv6.1trP28223</b> | <b>probable prolyl 4-hydroxylase 9</b>  | 37                                                  |
| Nbv61trP14824         | probable prolyl 4-hydroxylase 9         | 4                                                   |
| Nbv61trP9907          | probable prolyl 4-hydroxylase 9         | NA                                                  |
| <b>Nbv6.1trP31841</b> | <b>probable prolyl 4-hydroxylase 10</b> | 14                                                  |
| Nbv61trP17689         | probable prolyl 4-hydroxylase 10        | 8                                                   |
| Nbv61trP13474         | probable prolyl 4-hydroxylase 10        | 5                                                   |
| Nbv61trP32337         | probable prolyl 4-hydroxylase 3         | NA                                                  |

**Supplementary Table S4.**

Comparison of nucleic acid sequences of the *N. benthamiana* database (<https://benthgenome.qut.edu.au/>) entries (template) and sequences of the selected clones acquired after amplification from *N. benthamiana* cDNA library.

| Template       | Clone           | Query cover(%) | Identity (%) | Mutations | Gaps |
|----------------|-----------------|----------------|--------------|-----------|------|
| Nbv6.1trP71678 | <i>Nb-P4H1</i>  | 100            | 100          | 0         | 0    |
| Nbv6.1trP32386 | <i>Nb-P4H4</i>  | 100            | 99.63        | 3         | 0    |
| Nbv6.1trP28223 | <i>Nb-P4H9</i>  | 100            | 100          | 0         | 0    |
| Nbv6.1trP31841 | <i>Nb-P4H10</i> | 100            | 95.60        | 30        | 3    |

## SUPPLEMENTARY FIGURES

CLUSTAL O(1.2.4) multiple sequence alignment

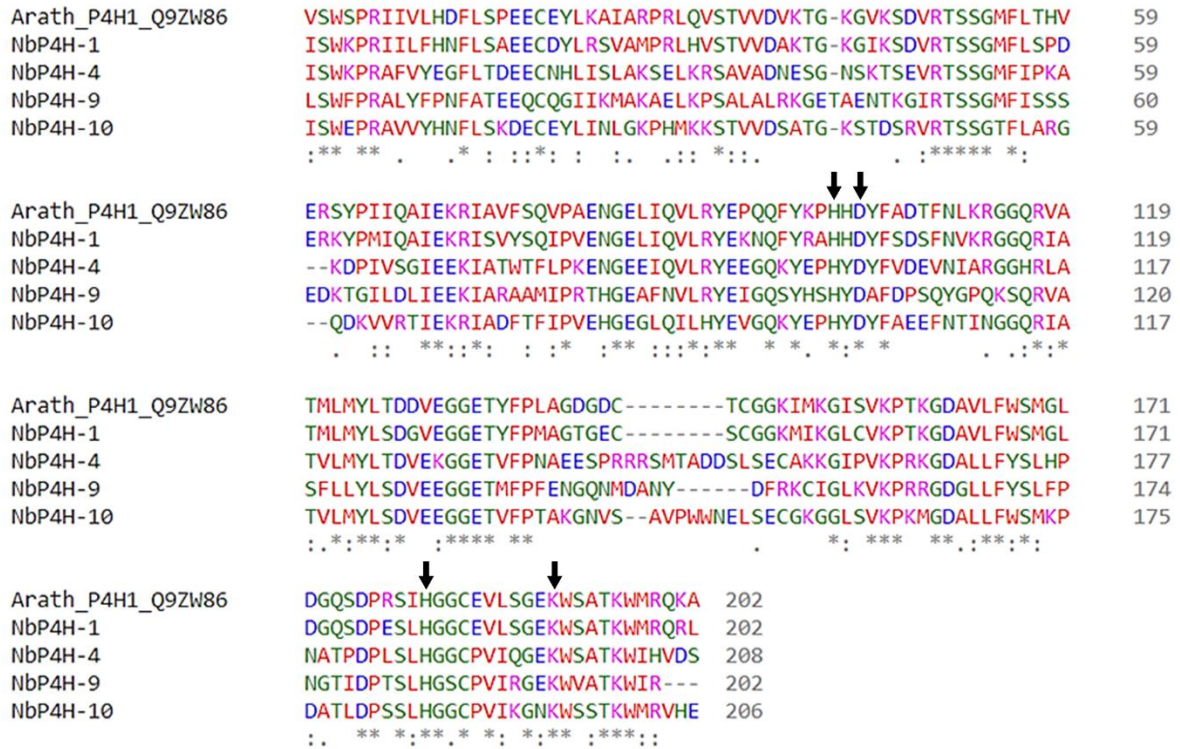

**Supplementary Figure S1.** Alignment of the catalytic domain sequences of the selected *N. benthamiana* P4H candidates next to the *Arabidopsis thaliana* P4H1 (Uniprot Q9ZW86). Arrows mark the three Fe<sup>2+</sup>-binding residues (two histidines and an aspartate), and the lysine binding the C-5 carboxyl group of the 2-oxoglutarate. Alignment was created with the Clustal Omega Multiple sequence alignment tool (Madeira et al., 2019).

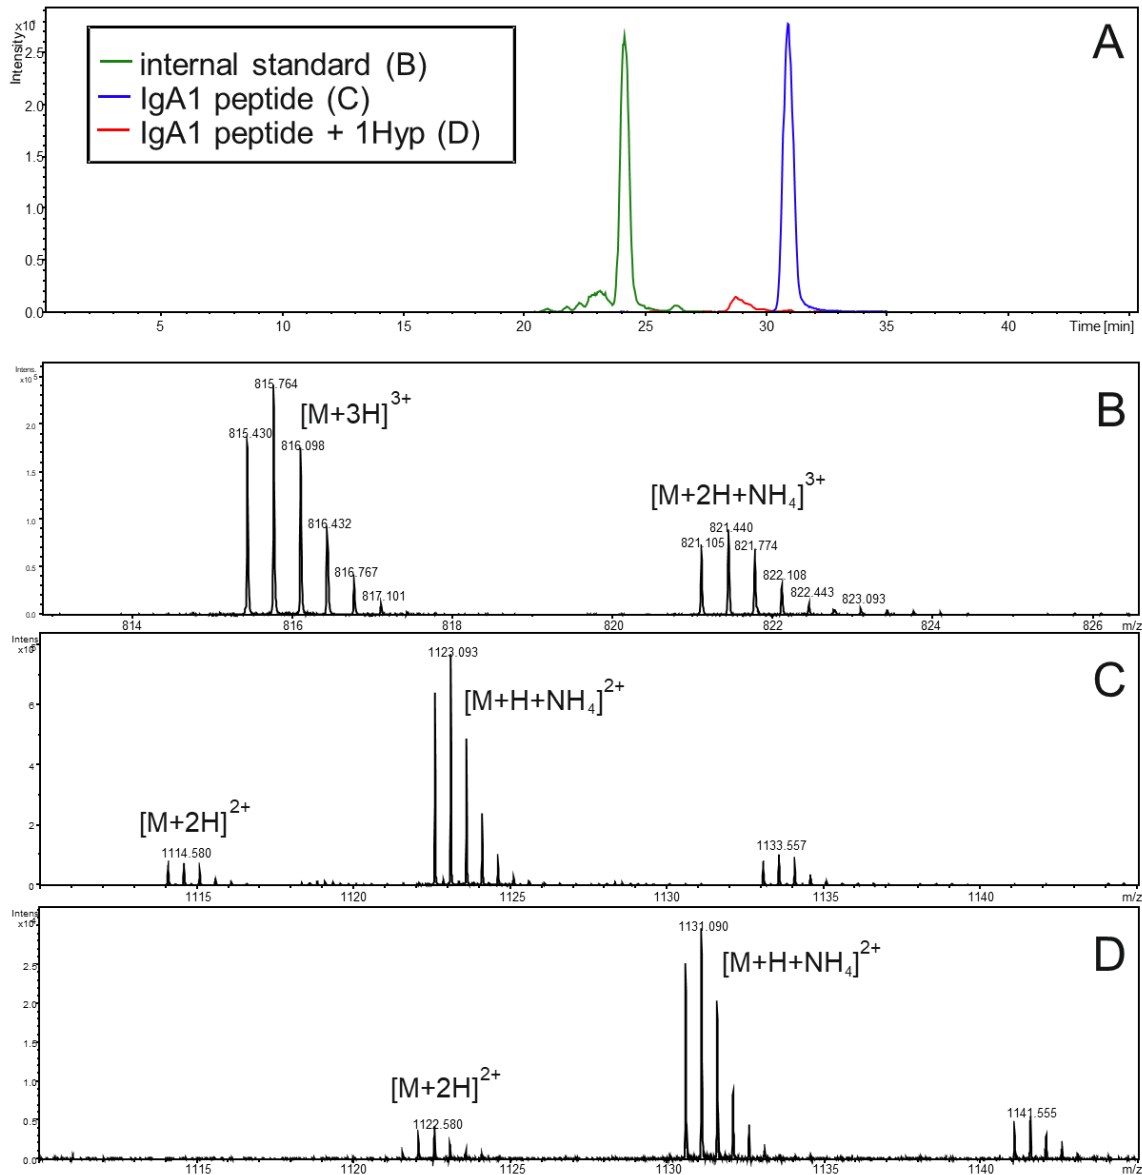

**Supplementary Figure S2.** A capillary-LC-ESI-MS measurement example (Nb-P4H9; 1.12 mM substrate). Assays were taken up in water and loaded onto a Biobasic capillary column (150×0.32 mm Thermo Scientific) using a Dionex Ultimate 3000 LC system coupled to a Bruker maXis 4G Q-TOF MS equipped with the standard ESI source. The concentration of the internal standard (PTTTPITTTTTVTPTPTGTQTK) remained the same for all measurements and was used for normalization of peak areas. The peak areas of the (A) base peak chromatograms were used for calculation. Representative mass spectra are depicted of the (B) internal standard, (C) the substrate IgA1 synthetic peptide (VTVPVSTPPTPSPSTPPTSPS) and the (D) one times oxidized product. Due to eluent composition the IgA1 peptide dominantly occurs as ammonium adduct, hence this form was used for quantification.

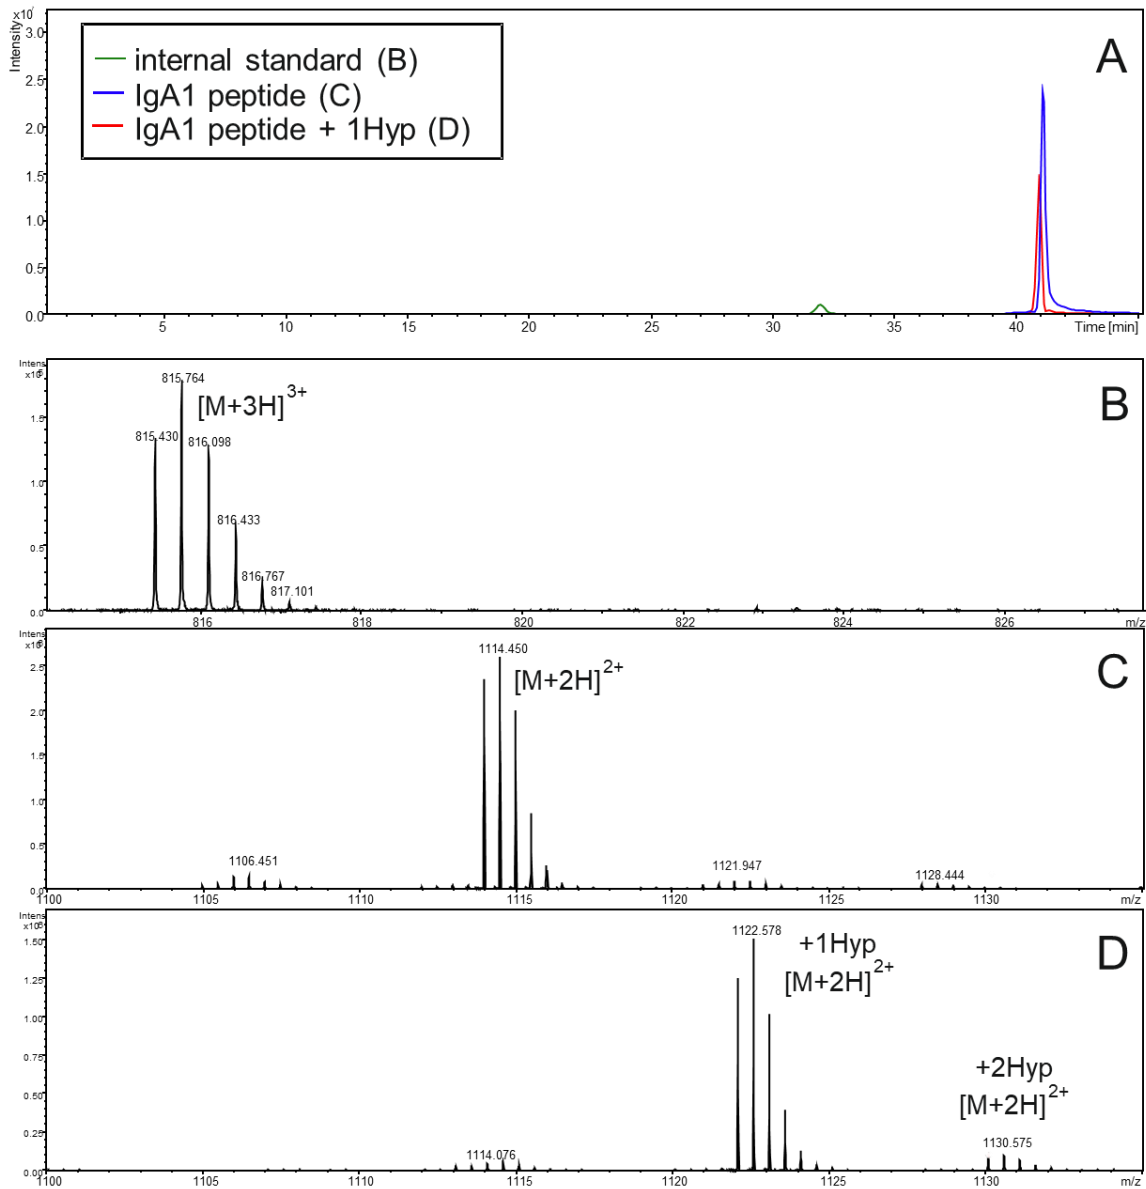

**Supplementary Figure S3.** A nano-LC-ESI-MS measurement example (Nb-P4H4; 1.12 mM substrate). Assays were taken up in water and loaded onto a Thermo Acclaim PepMap300 RSLC C18 separation column (2  $\mu$ m particle size, 150\*0.075 mm) with a Thermo Acclaim PepMap  $\mu$ -precolumn using a Dionex Ultimate 3000 LC system coupled to a Bruker maXis 4G Q-TOF MS equipped with the nano ESI source. The concentration of the internal standard (PTTTPITTTTTVTPTPTGTQTK) remained the same for all measurements and was used for normalization of peak areas. The peak areas of the (A) base peak chromatograms were used for calculation. Representative mass spectra are depicted of the (B) internal standard, (C) the substrate IgA1 synthetic peptide (VTVPVPSTPPTSPSTPPTSPS) and the (D) one times oxidized product. In the product spectra also a two times oxidized peptide (+2Hyp) can be found. Due to the negligible amount it was excluded from the calculations.

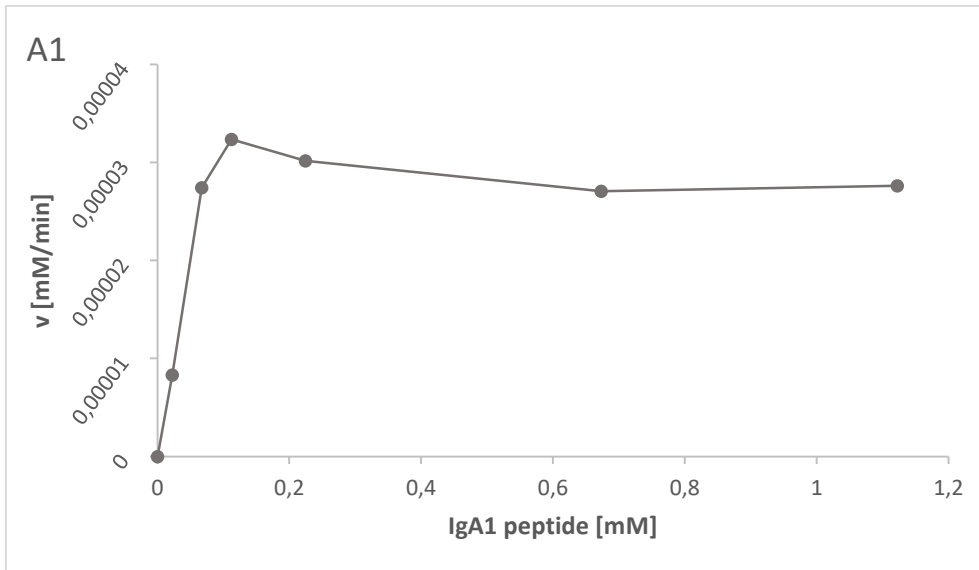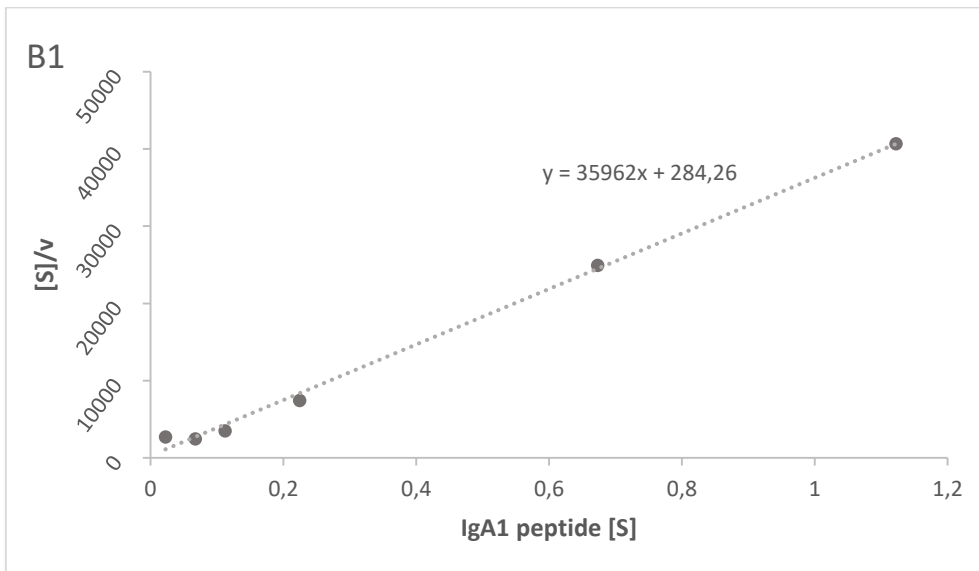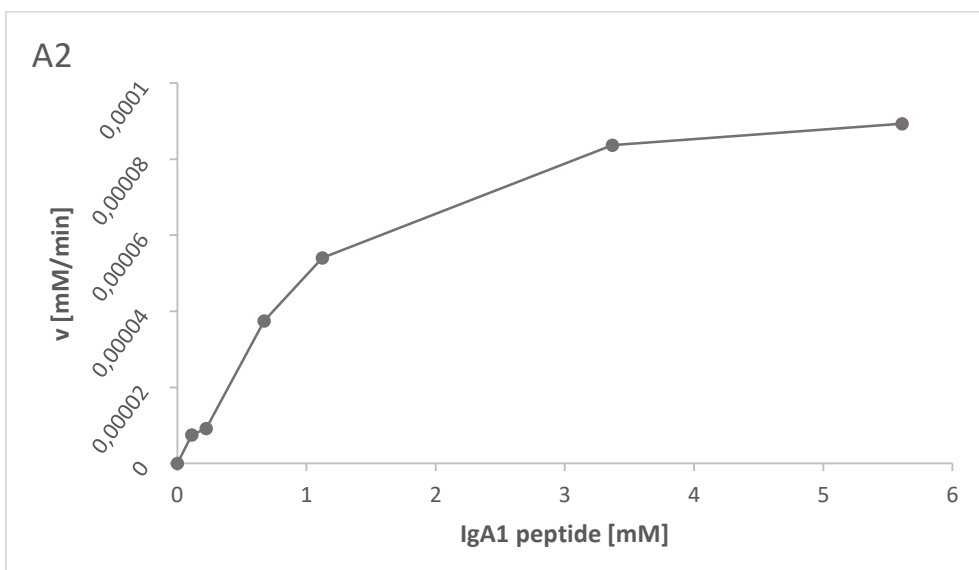

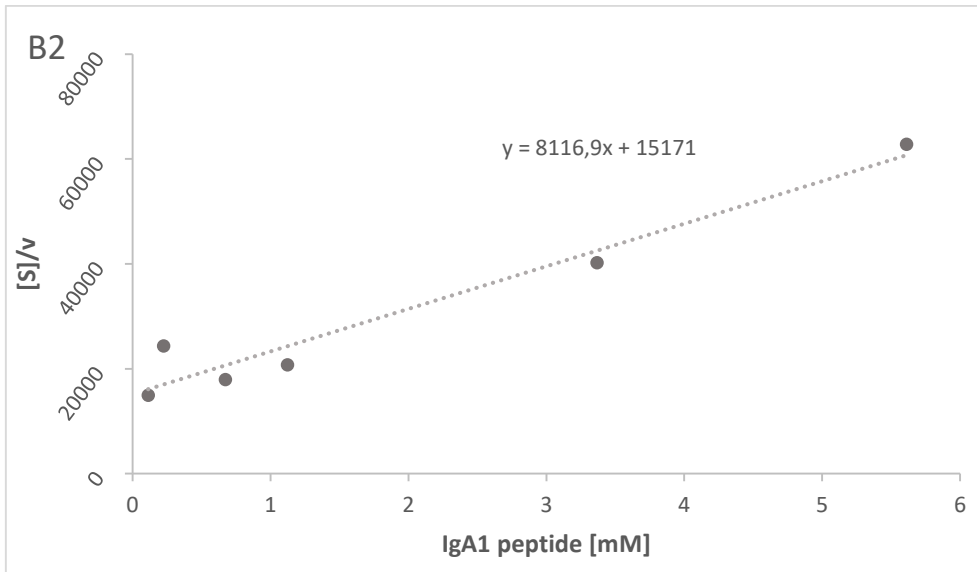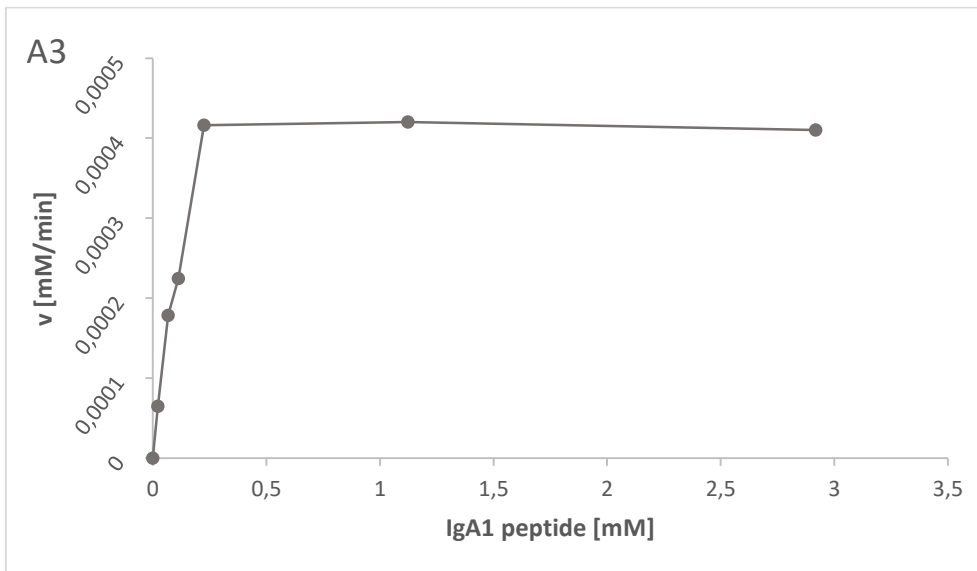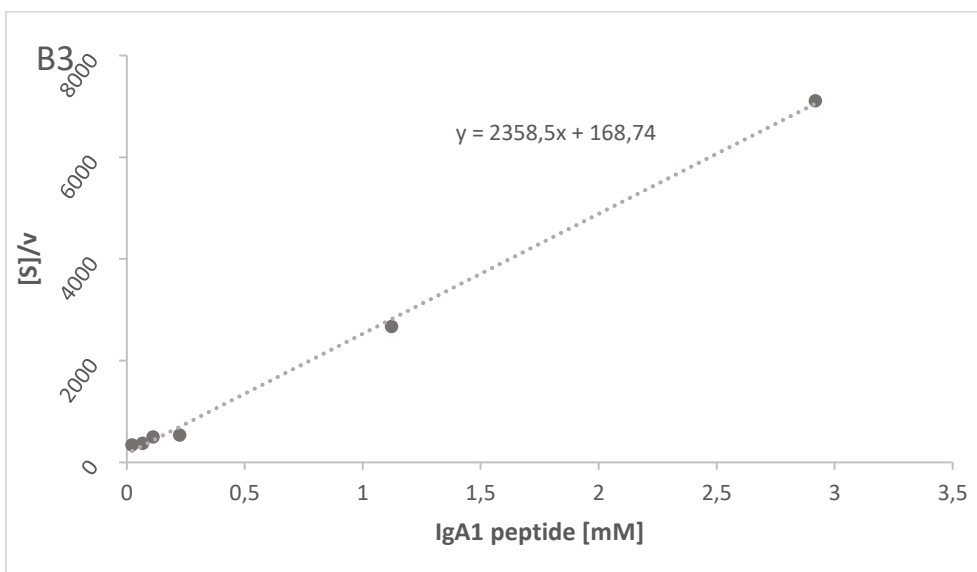



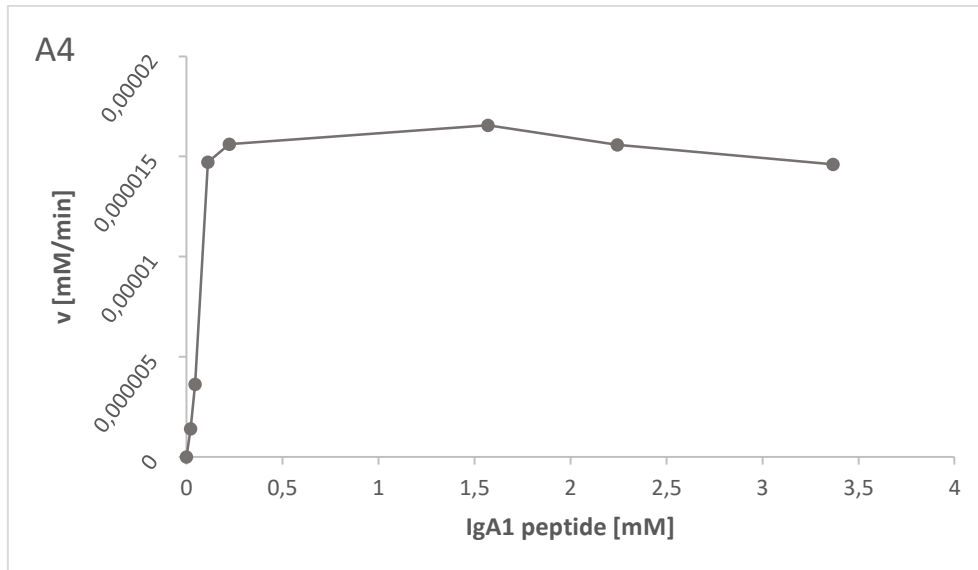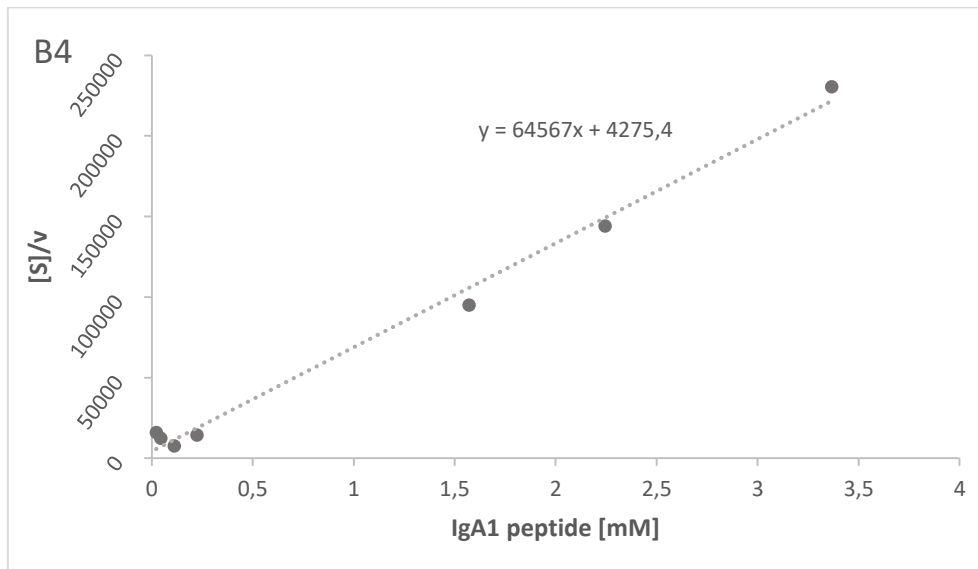

**Supplementary Figure S4.**  $K_m$  and  $v_{max}$  values were determined for (A1+B1) Nb-P4H1, (A2+B2) Nb-P4H4, (A3+B3) Nb-P4H9 and (A4+B4) Nb-P4H10. Concentrations from 0.02 to 5.61 mM of synthetic IgA1 peptide and a reaction time of 20 minutes (Nb-P4H9 and Nb-P4H10) or 30 minutes (Nb-P4H1 and Nb-P4H4) were used to calculate the  $K_m$  and  $v_{max}$  value. Analysis of the assays was done by LC-ESI-MS. (A1-A4) shows the velocity, which was calculated using a standard peptide, plotted against the substrate concentration. (B1-B4) Hanes-Woolf Plots for the calculation of the  $K_m$  and  $v_{max}$  values.

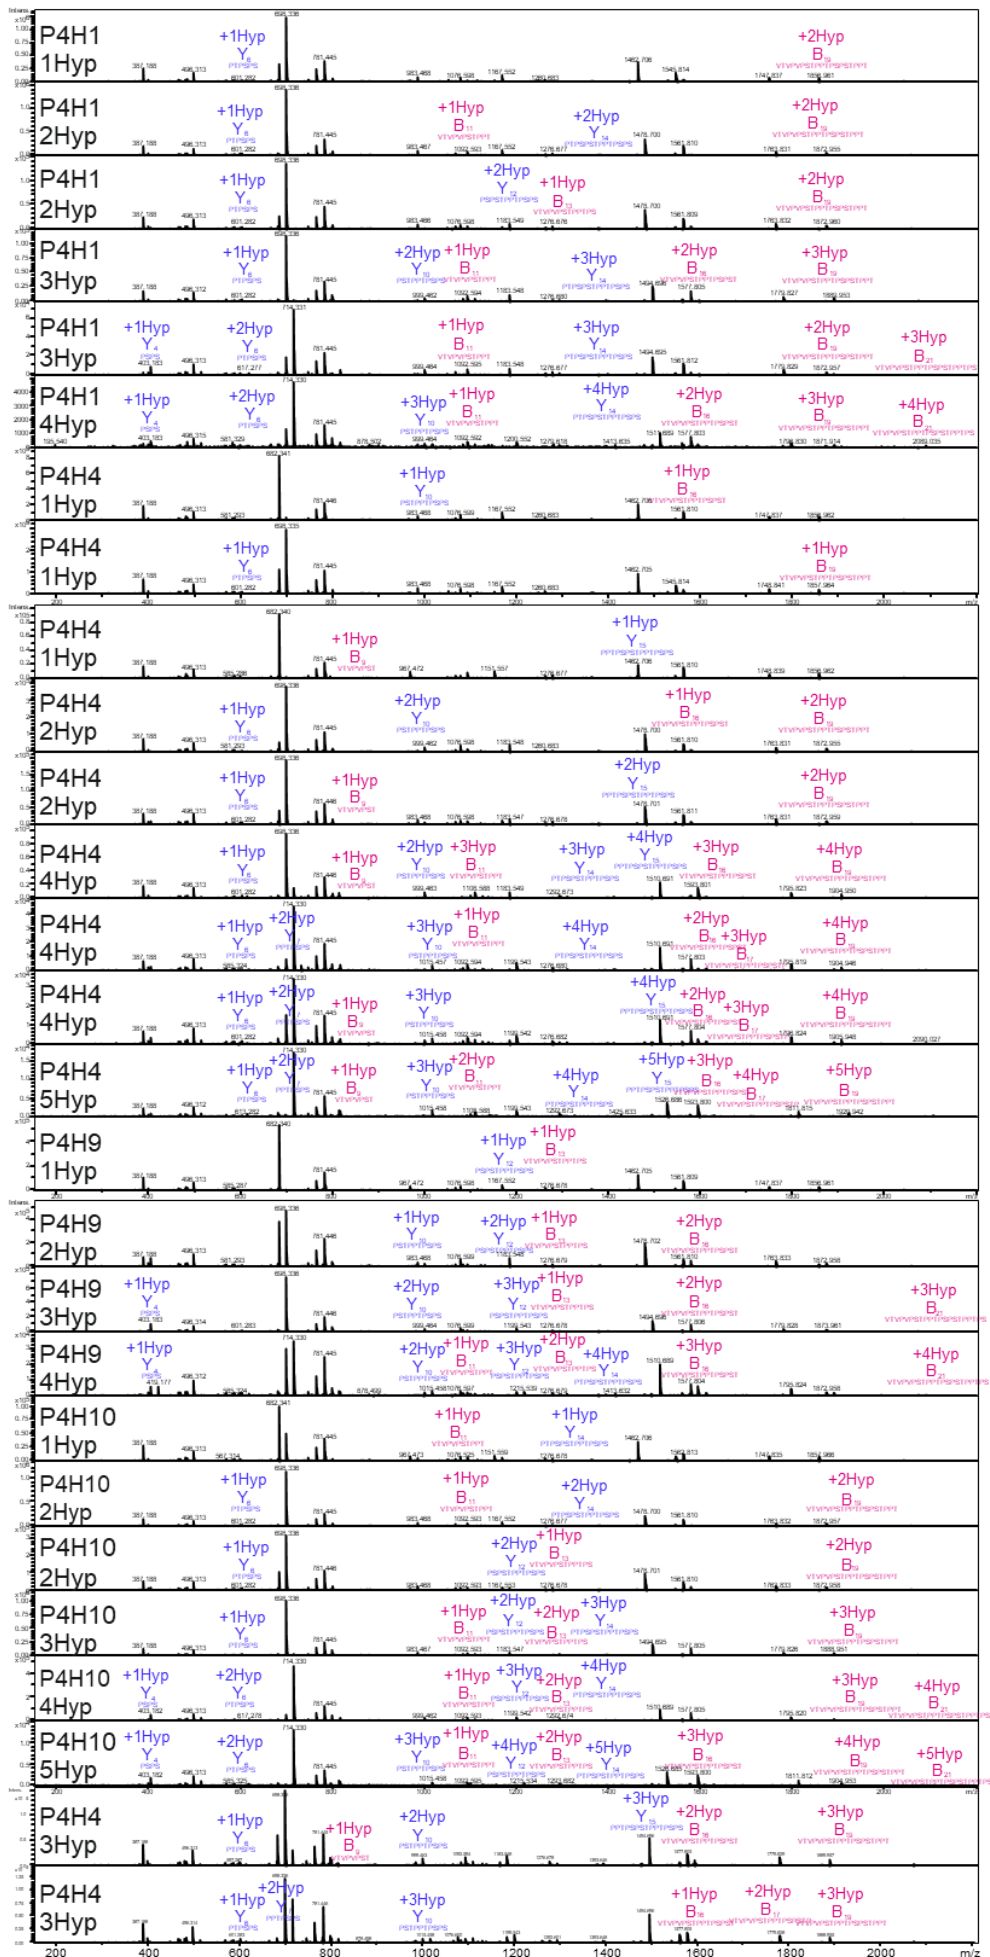

**Supplementary Figure S5.** Individual LC-ESI-MS/MS spectra of the separate Base Peak Chromatogram peaks of **Figure 4** used to determine oxidation sites. Diagnostic Y-ions are marked blue and B-ions pink. Substrate was a synthetically produced IgA1 peptide with the sequence of VTVPVSPSTPPTPSPSTPPTSPS.

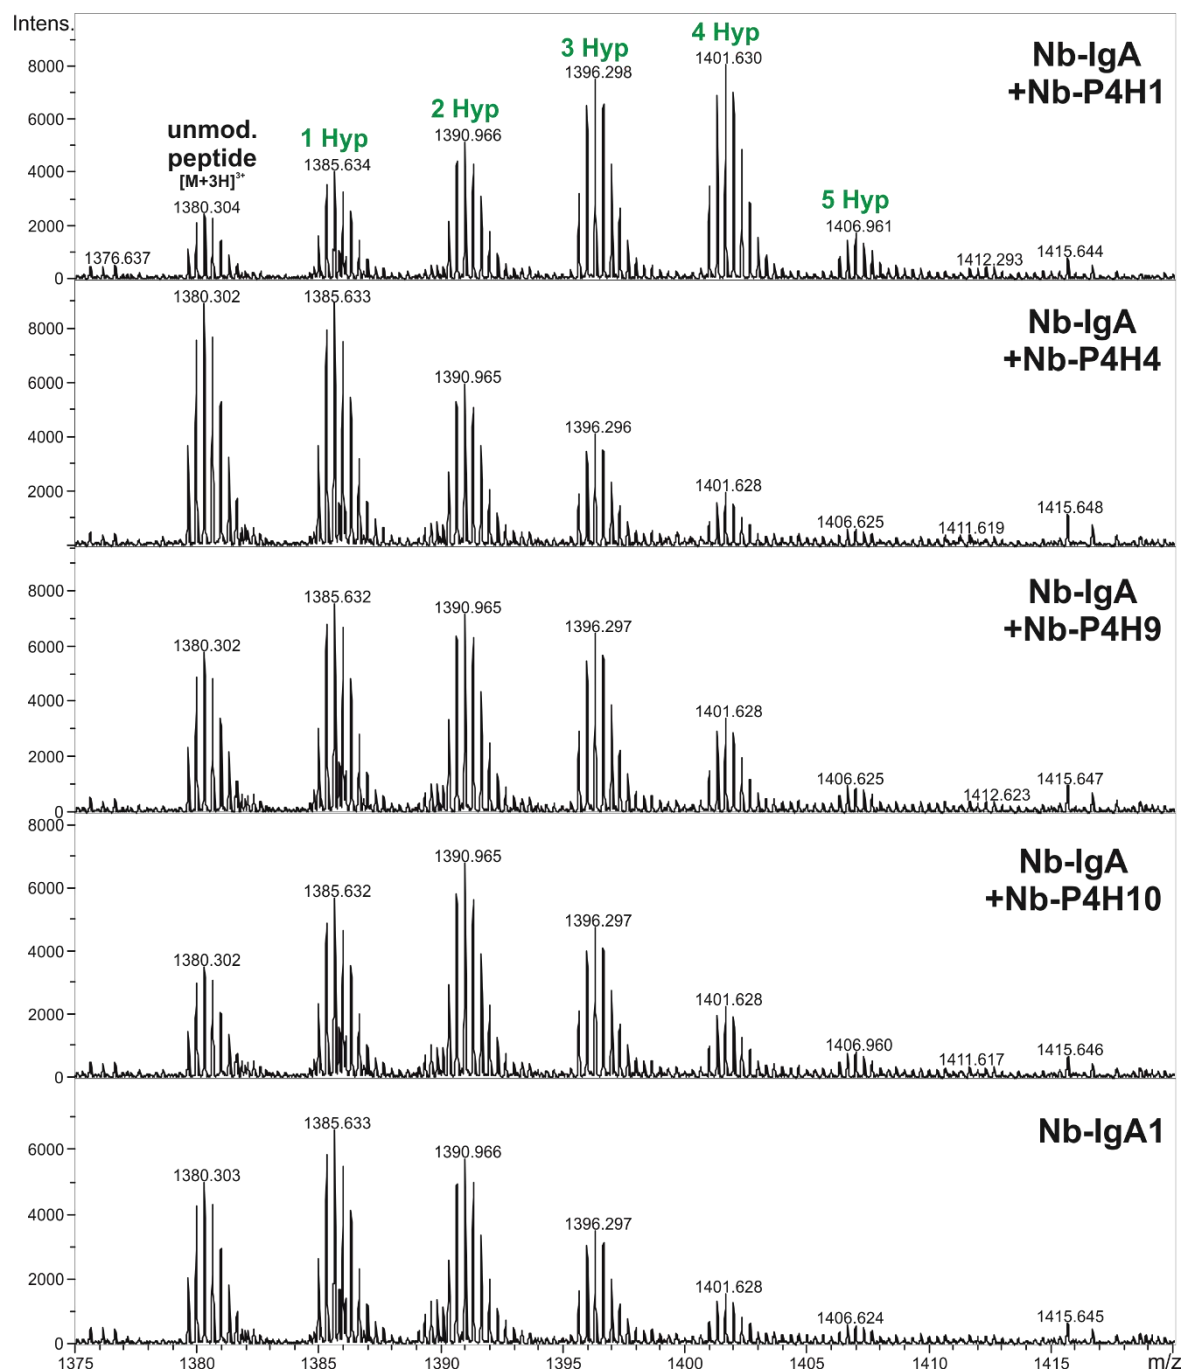

**Supplementary Figure S6.** LC-ESI-MS spectra of the IgA1 tryptic peptide (HYTNPSQDVTVPCVPSTPPTPSPSTPPTPSPSCCHPR - 4136.8899 Da) obtained after expressing IgA1 together with overexpression constructs of P4H candidates in *Nicotiana benthamiana*. After overexpression, a maximum of 6 hydroxyproline residues were attached to the peptide. Relative quantification of the data can be found in **Table 2** of the manuscript.

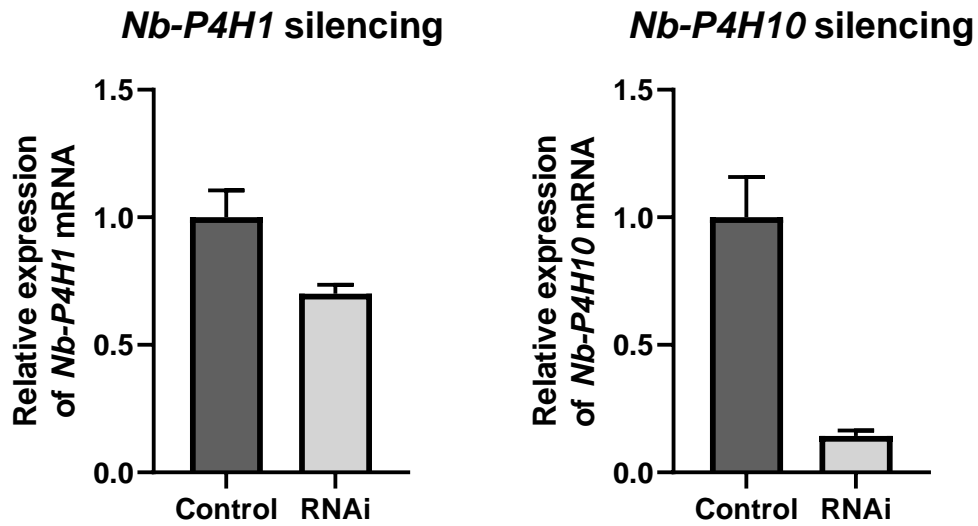

**Supplementary Figure S7.** Relative transcript levels of *Nb-P4H1* or *Nb-P4H10* mRNA in wild-type *N. benthamiana* leaves infiltrated with a control or a Nb-P4H gene silencing construct. Expression levels were analyzed by RT-qPCR. Values and error bars indicate means  $\pm$  SD (n = 3).

## SUPPLEMENTARY DATA

**Supplementary Data S1.** ORF regions of the selected *Nb-P4H* candidates amplified using *N. benthamiana* cDNA library and subcloned into pMiniT 2.0 vectors (NEB PCR mini kit; New England Biolabs, Frankfurt am Main, Germany). The sequences have been submitted to the NCBI nucleotide database and the GenBank accession numbers are in brackets.

### **pMiniT 2.0-*Nb-P4H1* (GenBank: MW524054)**

ATGGCTTCGGCAATGAGAATTGTTTTCGGGCTTCTTACACTTGTCACTTGTGGAATGATTCTCGGAGC  
TTTGATTCAACTAGCATTATTCATAGGATGGAGGACTCACTTGACAGAGAATCGTCTTTTGGTGAA  
AGCATGCAAGTTTAGCTGGCAACAAACATCCGTTAGCAAGAGGAATCTCTTATTGGGGTTACGACAAA  
GAAGCTGTAGCACTACGTATAGGATATGTGAAGCCTGAAATTTATTAGCTGGAAACCAAGAATTATATT  
ATTTCACAACTTCTTAAGTGCAGAGGAATGTGATTATCTTAGATCGGTTGCCATGCCCCGTCTTCATG  
TTTCAACTGTTGTAGATGCAAAAAGGAAATTAAGAGTGATGTCAGAACAAGTTCGGGAATG  
TTTTTGAGCCCTGATGAGAGGAAGTATCCCATGATACAGGCAATTGAAAAACGAATTTCTGTATATTC  
TCAAATACCAGTTGAAAATGGGGAACCTCATTCAAGTGTTAAGGTATGAAAAGAATCAGTTCTATAGAG  
CCCATCACGACTATTTCTCTGATTCATTTAATGTGAAGCGTGGAGGTCAACGAATAGCAACAATGCTC  
ATGTATTTGAGCGACGGCGTTGAGGGGGGAGAGACATACTTTCCCATGGCTGGCACTGGTGAATGTAG  
CTGTGGTGGCAAAATGATCAAAGGGTTATGTGTAACCTACTAAAGGAGATGCTGTTCTTTTTTGGAA  
GCATGGGGCTTGATGGACAATCTGACCCTGAGAGTTTACATGGAGGATGTGAAGTACTCTCAGGAGAG  
AAGTGGTCAGCTACTAAATGGATGAGGCAAAGACTTGTATCCTAA

### **pMiniT 2.0-*Nb-P4H4* (GenBank: MW524055)**

ATGAACAGCTCTTTGCTGCTCGCTACTTTCTTCTTCTCCTCTTCATCATAGCTTTTGTGCGGAATCGTC  
CAGCTCAGCGATCATCAACCCATCCAAAGTCAAGCAAATTTTCATGGAAACCTAGAGCATTTGTATATG  
AAGGATTTCTTACGGATGAAGAATGCAATCACTTGATATCTCTCGCAAAATCGGAGCTGAAGAGATCG  
GCTGTGGCAGACAATGAGTCTGAAATAGTAAGACCAGTGAGGTTAGGACTAGCTCCGGAATGTTTCAT  
TCCCAAAGCTAAGGATCCTATTGTTTCTGGGATAGAGGAGAAGATAGCAACTTGGACTTTTCTACCAA  
AAGAGAATGGAGAAGAAATACAAGTACTAAGATATGAGGAGGGGCAGAAATATGAGCCACACTATGAT  
TACTTTGTAGACGAGGTTAATATGCTCGAGGTGGACATCGCTTGGCCACTGTACTTATGTATCTCAC  
AGATGTTGAAAAGGGAGGTGAAACTGTCTTCCCTAATGCAGAGGAATCACCTCGGCGTAGGTTCGATGA  
CAGCAGATGACAGCTTGTCTGAATGTGCAAAGAAGGGTATAACCAGTGAAACCACGGAAAGGAGATGCC  
CTTCTTTTCTACAGTCTACATCCAAATGCCACTCCTGATCCTCTTAGTCTCCATGGTGGGTGCCCTGT  
CATTCAAGGTGAGAAATGGTCAGCAACAAAGTGGATTTCATGTGGATTCTTTTGTCAAACTGTGGAGA  
CCGTAGGAAATTCGAGCGATCGTGATGAGAATTGTGAGAGATGGGCTGCTCTTGGGGAATGCACCAAG  
AATCCAGAGTACATGCTGGGAAGTGCAGGCCTTCCAGGATATTGTAGGAAGAGCTGCAAAGCCTGTTA  
A

### **pMiniT 2.0-*Nb-P4H9* (GenBank: MW524056)**

ATGAAGAACAGAGGCAAATTACCGGGACAAAGATGGTGGAGCTTAGGGTTACCTTCGGTTTTTCTCCT  
TTGTCTTTTCTTCTCCTCGTCGGTTTTATTTCGGTTCTACTTTTCATCTCTCAGCAGGATGTACAAGTAG  
GTAGTGTACGACCTAGGTCGAGGGTGCTTGAATCTGTGGAAGAATTTGATGCTTTGCCCAATGGCGAG  
ACTGGAGAACATTCACTCACTTCCATCCCCTTTCAGGTCTTAAGCTGGTTCCCGCGTGCATTATACTT  
TCCCAATTTTGAACCTGAAGAACAATGCCAAGGCATTATTAAGATGGCAAAGGCAGAGCTGAAACCAT  
CAGCTTTGGCTCTCCGCAAAGGAGAAACAGCAGAGAATAACCAAAGGAATAAGAACAAGTCTGGAATG  
TTTATCAGTTCATCTGAAGACAAAAGTGGAAATTTGGACCTCATTGAGGAAAAAATTGCAAGGGCGGC  
TATGATCCCCAGGACACATGGAGAGGCATTTAATGTGTTGCGGTATGAAATCGGCCAGAGTTATCATT  
CACATTATGATGCATTTGATCCTTCTCAATATGGTCCTCAGAAGAGCCAAAGGGTTGCATCCTTTTTTA  
TTGTATTTATCTGATGTGGAAGAAGGTGGAGAGACCATGTTTCTTTTCGAGAATGGGCAGAACATGGA  
TGCTAATTATGACTTCCGAAAGTGTATTGGTTTGAAGTGAAGCCGCGTAGAGGGGATGGACTACTGT  
TCTACTCACTGTTTCCAAATGGTACAATTGATCCGACATCTCTTACGGGAGCTGTCCAGTAATCAGA  
GGCGAAAAATGGGTTGCCACAAAGTGGATCAGGGATCAGGAACTTGATGAATAA

**pMiniT 2.0-Nb-P4H10 (GenBank: MW524057)**

ATGGCAGTCAAAGGAAGGCACGTCCGAGGTGGTCTACCTCGTAAATCATCGAATTCGACGCTGGTCTT  
TGCCGTATTTATTGGATTATCTCTTCTCGTTTTGATTCTTCTCGCTTTTTGGAATTTTCTCGATTCCCTT  
TCAGTTCTAAAGGATCTCAAAAAGCACATGATCTTAGCTCAATTGCGCACACGCAGTTGGAAGACGA  
GGTGATGATGGTGGAAAAGGAGATCAGTGGGCTGAAGTGATTTCATGGGAACCAAGAGCTGTTGTGTA  
CCATAACTTCTTGTCAAAGGACGAATGTGAATATCTGATTAATCTTGGCAAGCCTCATATGAAAAAGT  
CAACTGTCGTCGACAGTGCTACTGGCAAGAGTACTGATAGCAGGGTTCGAACAAGTTCTGGAACATTT  
CTTGCCAGGGGACAAGATAAAGTAGTCAGGACTATAGAGAAAAGGATTGCAGATTTTACTTTTATAACC  
AGTAGAGCATGGTGAAGGTCTACAAATTCTCCACTATGAAGTTGGGCAAAAGTATGAGCCACACTATG  
ATTACTTTGCCGAAGAGTTCAATACTATAAATGGTGGTCAACGCATTGCCACGGTTTTGATGTA  
TCAGATGTGGAAGAAGGGGGAGAACTGTATTTCCACTGCCAAGGGAAATGTTAGTGCAGTTCCCTTG  
GTGGAATGAGCTATCTGAATGTGGAAGGTGGACTCTCTGTAAAACCAAAGATGGGTGATGCTTTGC  
TTTTCTGGAGCATGAAGCCTGATGCTACTCTTGATCCTTCAAGCTTGCATGGTGGGTGCCCTGTGATT  
AAGGGTAACAAGTGGTCGTCTACGAAATGGATGCGTGTTACGAATACAAGGTTTAA

**Supplementary Data S2. Sequence A:** Synthetic *NbP4H1*-RNAi sequence in pMA-GeneArt cloning vector. The sequence consists of a *N. benthamiana P4H1* cDNA fragment (bold), restriction enzyme cleavage sites (underlined) and the intron 2 (italics) from the *Arabidopsis thaliana*  $\beta$ 1,2-xylosyltransferase gene (At5g55500) (Strasser et al., 2008). **Sequence B:** Synthetic *NbP4H10*-RNAi sequence in pMA-GeneArt cloning vector. The sequence consists of a *N. benthamiana P4H10* cDNA fragment (bold), restriction enzyme cleavage sites (underlined) and the intron 2 (italics) from the *Arabidopsis thaliana*  $\beta$ 1,2-xylosyltransferase gene (AT5g55500) (Strasser et al., 2008).

**Sequence A:**

TTCTAGAGGGGGGAGAGACATACTTTCCCATGGCTGGCACTGGTGAATGTAGCTGTGGTGGCAAAATG  
**ATCAAAGGGTTATGTGTAACCTACTAAAGGAGATGCTGTTCTTTTTTGGAGCATGGGGCTTGATGG**  
**ACAATCTGACCCTGAGAGTTTACATGGAGGATGTGAAGTACTCTCAGGAGAGAAGTGGTCAGCTACTA**  
**AATGGATGAGGCAAGATCT***GTATGCTCCTCTTCTTGTTCATGGTCATGATCCTTATATGAGCAGGGAA*  
*AGTCCAGTTTAGACTTGTAGTTAGTTACTCTTCGTTATAGGATTTGGATTTCTTGCGTGTATGGTT*  
*TTAGTTTCCCTCCTTTGATGAATAAAATTGAATCTTGTATGAGTTTCATATCCATGTTGTGAATCTTT*  
*TTGCAGGGTACCTTTGGATCC*

**Sequence B:**

aaTCTAGA**AAATGGTGGTCAACGCATTGCCACGGTTTTGATGTA****CTTATCAGATGTGGAAGAAGGGGG**  
**AGAACTGTATTTCTACTGCCAAGGGAAATGTTAGTGCAGTTCCCTTGGTGGAAATGAGCTATCTGAAT**  
**GTGGAAGGTGGACTCTCTGTAAAACCAAAGATGGGTGATGCTTTGCTTTTCTGGAGCATGAAGCCT**  
**GATGCTACTCTTGATCCTTCAAGCTTGCATGGTGGGTGCCCTGTGATTAAGGGTAACAAGTGGTCGTC**  
**TACGAAATGGATGC**AGATCT*GTATGCTCCTCTTCTTGTTCATGGTCATGATCCTTATATGAGCAGGGA*  
*AAGTCCAGTTTAGACTTGTAGTTAGTTACTCTTCGTTATAGGATTTGGATTTCTTGCGTGTATGGT*  
*TTAGTTTCCCTCCTTTGATGAATAAAATTGAATCTTGTATGAGTTTCATATCCATGTTGTGAATCTT*  
*TTTGCAGGGTACCTTTGGATCC*
